# Supplementary material for: Spawning aggregation of white-streaked grouper Epinephelus ongus: spatial distribution and annual variation in the fish density within a spawning ground
Source: PeerJ. 2017 Feb 14;5:e3000. doi: 10.7717/peerj.3000 (PMC5312569; doi:10.7717/peerj.3000)
Supplement: Supplemental Information 6 [file peerj-05-3000-s006.xlsx]

## Sheet: Sheet1
	Average seawater temperature	Max. Number of individuals
May 2011	24.8975	1157
May 2012	25.3578	841
May 2013	24.0925	194
May 2014	24.423	544
May 2015	24.8396	579
