# Supplementary material for: Spawning aggregation of white-streaked grouper Epinephelus ongus: spatial distribution and annual variation in the fish density within a spawning ground
Source: PeerJ. 2017 Feb 14;5:e3000. doi: 10.7717/peerj.3000 (PMC5312569; doi:10.7717/peerj.3000)
Supplement: Supplemental Information 8 [file peerj-05-3000-s008.xlsx]

## Sheet: Sheet1
Month-Year	Transect No.	2 days before LQM		1 day before LQM		LQM		1 day after LQM		2 days after LQM
May 2012		Male	Female	Male	Female	Male	Female	Male	Female	Male	Female
	Transect 1	38	21	40	38	51	31	50	14	40	1
	Transect 2	21	5	31	14	35	7	19	9	35	0
	Transect 3	29	13	35	22	44	20	32	18	17	0
	Transect 4	10	0	22	7	22	6	29	2	19	0
	Transect 5	19	1	21	0	27	5	29	2	10	0
Month-Year	Transect No.	2 days before LQM		1 day before LQM		LQM		1 day after LQM		2 days after LQM
May 2013		Male	Female	Male	Female	Male	Female	Male	Female	Male	Female
	Transect 1	8	0	10	0	10	0	3	0	2	0
	Transect 2	18	0	20	1	20	0	11	0	7	0
	Transect 3	8	0	10	0	18	1	5	0	2	0
	Transect 4	5	0	8	0	9	0	9	0	2	0
	Transect 5	21	1	18	1	27	0	12	0	6	0
	Transect 6	19	0	20	0	17	2	9	0	0	0
	Transect 7	17	0	15	2	12	1	9	0	0	0
	Transect 8	22	1	18	2	15	2	9	0	1	0
	Transect 9	15	1	18	1	14	0	10	0	0	0
	Transect 10	26	1	24	5	23	3	6	0	1	0
Month-Year	Transect No.	2 days before LQM		1 day before LQM		LQM		1 day after LQM		2 days after LQM
May 2014		Male	Female	Male	Female	Male	Female	Male	Female	Male	Female
	Transect 1	10	11	16	9	14	11	15	3	8	1
	Transect 2	12	3	12	4	15	4	15	0	1	0
	Transect 3	13	1	15	6	15	10	20	2	4	0
	Transect 4	7	2	6	1	12	1	14	0	2	0
	Transect 5	9	1	12	2	15	2	14	0	3	0
	Transect 6	23	7	20	7	33	4	9	1	1	0
	Transect 7	22	5	25	8	22	17	17	0	4	0
	Transect 8	21	8	21	8	26	6	15	1	0	0
	Transect 9	26	4	31	5	25	7	10	0	1	0
	Transect 10	39	11	39	3	41	3	11	1	1	0
Month-Year	Transect No.	2 days before LQM		1 day before LQM		LQM		1 day after LQM		2 days after LQM
May 2015		Male	Female	Male	Female	Male	Female	Male	Female	Male	Female
	Transect 1	5	0	10	4	6	8	19	2	2	0
	Transect 2	6	0	10		10	2	10	1	1	0
	Transect 3	6	0	8	5	14	7	14	0	4	0
	Transect 4	6	0	13	1	10	3	16	0	0	0
	Transect 5	4	0	10	1	5	1	8	0	0	0
	Transect 6	15	0	28	15	51	14	28	0	0	0
	Transect 7	8	0	33	18	36	15	26	2	0	0
	Transect 8	7	0	21	7	24	9	16	0	0	0
	Transect 9	7	0	40	18	48	27	26	0	0	0
	Transect 10	7	1	18	8	38	8	10	1	0	0
